# Supplementary material for: Traditional Chinese medicine and new concepts of predictive, preventive and personalized medicine in diagnosis and treatment of suboptimal health
Source: Springer Nature journal article supplement (doi:10.1186/1878-5085-5-4), 2014-02-13
Supplement: Additional file 1 [file 1878-5085-5-4-s1.pdf]

Home | EPMA Journal


xml version="1.0" encoding="UTF-8"?

Skip to main content


Log in

Menu

Find a journal

Publish with us

Track your research

Search

Cart

1. Home
2. EPMA Journal

# EPMA Journal

Publishing model:
:   Hybrid

Submit your manuscript (this opens in a new tab)

- Editorial board
- Aims and scope
- Journal updates

## Overview

*EPMA Journal* publishes results and achievements in primary (individualised protection of healthy persons against health-to-disease transition) and secondary (individualised protection against disease progression) care

- Focused on paradigm change from reactive medicine to cost-effective predictive approach, targeted prevention and treatments tailored to the person.
- This type of research and medical care is complex and requires multi-professional expertise.
- Application of patient-friendly non-invasive diagnostics and innovative treatment algorithms tailored to the individualised patient profile is envisaged.
- Innovative technology development follows the concept “From Bench to Bedside”.
- Official journal of the European Association for Predictive, Preventive and Personalized Medicine, EPMA, Brussels.

Editor-in-Chief
:   - Olga Golubnitschaja

Impact factor
:   **6.5 (2022)**

5 year impact factor
:   **5.3 (2022)**

Submission to first decision (median)
:   7 days

Downloads
:   427,841 (2023)

## Societies and partnerships

- European Association for Predictive, Preventive and Personalised Medicine (EPMA) (opens in a new tab)

## Latest issue

March 2024
|

Volume 15, Issue 1

Predictive, Preventive and Personalised Approach in Primary and Secondary Healthcare; Special issue – Internationally awarded research innovation

View all volumes and issues

## Latest articles

1. ### Mini-encyclopedia of mitochondria-relevant nutraceuticals protecting health in primary and secondary care—clinically relevant 3PM innovation

   - Olga Golubnitschaja
   - Andrea Kapinova
   - Peter Kubatka

   Research

   Open access

   18 April 2024
2. ### Mediterranean diet in the targeted prevention and personalized treatment of chronic diseases: evidence, potential mechanisms, and prospects

   - Yuji Xiao
   - Xuefei Xiao
   - Ningning Wang

   Review

   16 April 2024
3. ### Energy metabolism as the hub of advanced non-small cell lung cancer management: a comprehensive view in the framework of predictive, preventive, and personalized medicine

   - Ousman Bajinka
   - Serge Yannick Ouedraogo
   - Xianquan Zhan

   Review

   Open access

   08 April 2024
4. ### Clinically relevant stratification of lung squamous carcinoma patients based on ubiquitinated proteasome genes for 3P medical approach

   - Jingru Yang
   - Serge Yannick Ouedraogo
   - Xianquan Zhan

   Research

   04 March 2024

   Pages: 67 - 97
5. ### The paradigm change from reactive medical services to 3PM in ischemic stroke: a holistic approach utilising tear fluid multi-omics, mitochondria as a vital biosensor and AI-based multi-professional data interpretation

   - Olga Golubnitschaja
   - Jiri Polivka Jr.
   - Jiri Polivka

   Research

   Open access

   27 February 2024

   Pages: 1 - 23

View all articles

This journal has

527 open access articles

## Journal updates

- ### Editor-in-Chief Highlights: September 2023

  View the latest Editor-in-Chief highlights from EPMA Journal.
- ### Editor-in-Chief Highlights: June 2023

  View the latest Editor-in-Chief highlights from EPMA Journal.
- ### Editor-in-Chief Highlights: June 2022

  ### View the latest Editor-in-Chief highlights from EPMA Journal.
- ### Editor-in-Chief Highlights: March 2022

  View the latest Editor-in-Chief highlights from *EPMA Journal*.

View all updates

## Journal information

Electronic ISSN
:   1878-5085

Abstracted and indexed in
:   1. ANVUR
    2. Baidu
    3. CAB Abstracts
    4. CLOCKSS
    5. CNKI
    6. CNPIEC
    7. Current Contents/Life Sciences
    8. Dimensions
    9. EBSCO
    10. EMBASE
    11. Gale
    12. Google Scholar
    13. Japanese Science and Technology Agency (JST)
    14. Meta
    15. Naver
    16. Norwegian Register for Scientific Journals and Series
    17. OCLC WorldCat Discovery Service
    18. Portico
    19. ProQuest
    20. Psyndex
    21. PubMedCentral
    22. Reaxys
    23. SCImago
    24. SCOPUS
    25. Science Citation Index Expanded (SCIE)
    26. TD Net Discovery Service
    27. UGC-CARE List (India)
    28. Wanfang

Copyright information
:   Rights and permissions

    Springer policies

    © European Association for Predictive, Preventive and Personalised Medicine (EPMA)


## For authors

- Submission guidelines
- Language editing services (this opens in a new tab)
- Ethics and disclosures
- How to publish with us
- Open Access fees and funding
- Contact the journal

### Language quality checker

Get your manuscript edited for free

- Use our pre-submission checklist

  Avoid common mistakes on your manuscript.
- This journal's calls for papers

  Collections this journal is participating in.
- Sign up for alerts

  Get notified when new articles are published.

## Explore

- Articles
- Volumes and issues
- Collections

## Search

Search by keyword or author

Search

## Navigation

- Find a journal
- Publish with us
- Track your research

### Discover content

- Journals A-Z
- Books A-Z

### Publish with us

- Publish your research
- Open access publishing

### Products and services

- Our products
- Librarians
- Societies
- Partners and advertisers

### Our imprints

- Springer
- Nature Portfolio
- BMC
- Palgrave Macmillan
- Apress

- Your privacy choices/Manage cookies
- Your US state privacy rights
- Accessibility statement
- Terms and conditions
- Privacy policy
- Help and support

18.225.149.32

Not affiliated


© 2024 Springer Nature
